# Supplementary material for: Binding free energy based structural dynamics analysis of HIV-1 RT RNase H–inhibitor complexes
Source: Royal Society of Chemistry journal article supplement (doi:10.1039/c4ib00111g), 2014-01-01

# **Binding Free Energy Based Structural Dynamics Analysis of HIV-1 RT RNase H-Inhibitor Complexes †**

Vasanthanathan Poongavanam\*, Jógvan Magnus Haugaard Olsen and Jacob Kongsted

*Department of Physics, Chemistry and Pharmacy, University of Southern Denmark,  
Campusvej 55, DK-5230 Odense M, Denmark*

\* Corresponding author: Vasanthanathan Poongavanam (nathan@sdu.dk), Tel: +45 65502304, Fax: +45 66158760.

Fig. 1: Right: Binding mode of BHMP07 (green stick) in RNH compared to the X-ray crystal bound ligand (pink stick). The active and allosteric sites are indicated by yellow and green surface, respectively. Left: Overall topology of reverse transcriptase is shown and important structural domains are labeled.

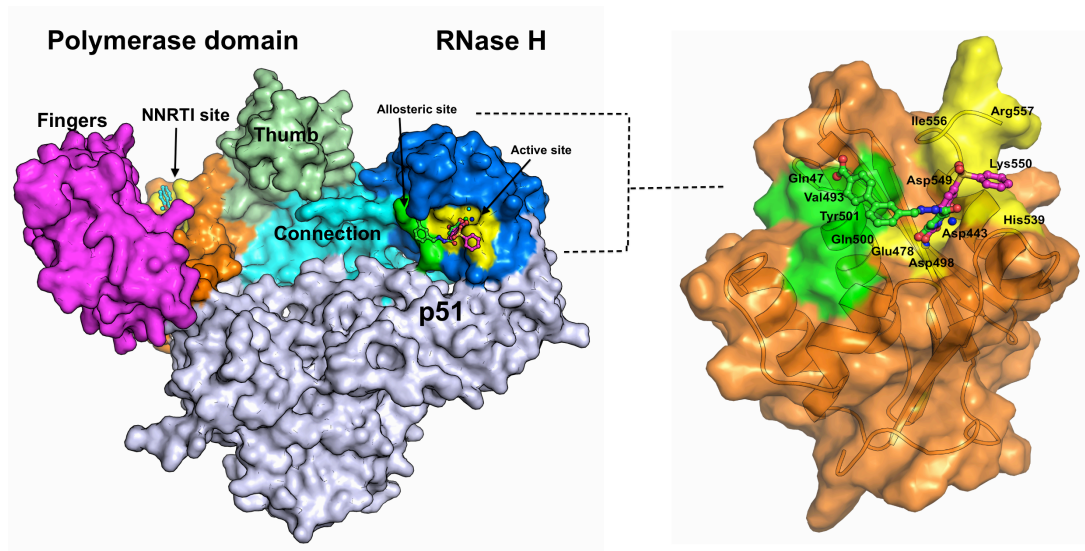

Fig. 2: Energy convergence check for protein-ligand complexes.

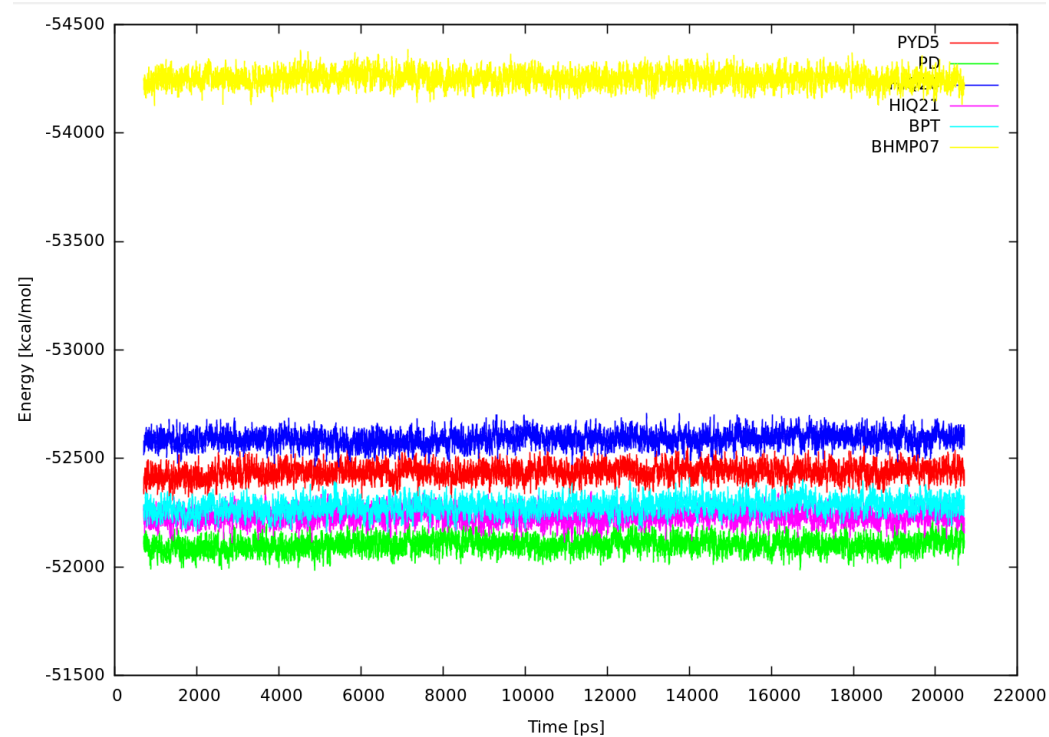

Fig. 3 RMSD of backbone heavy atoms relative to their initial structure.

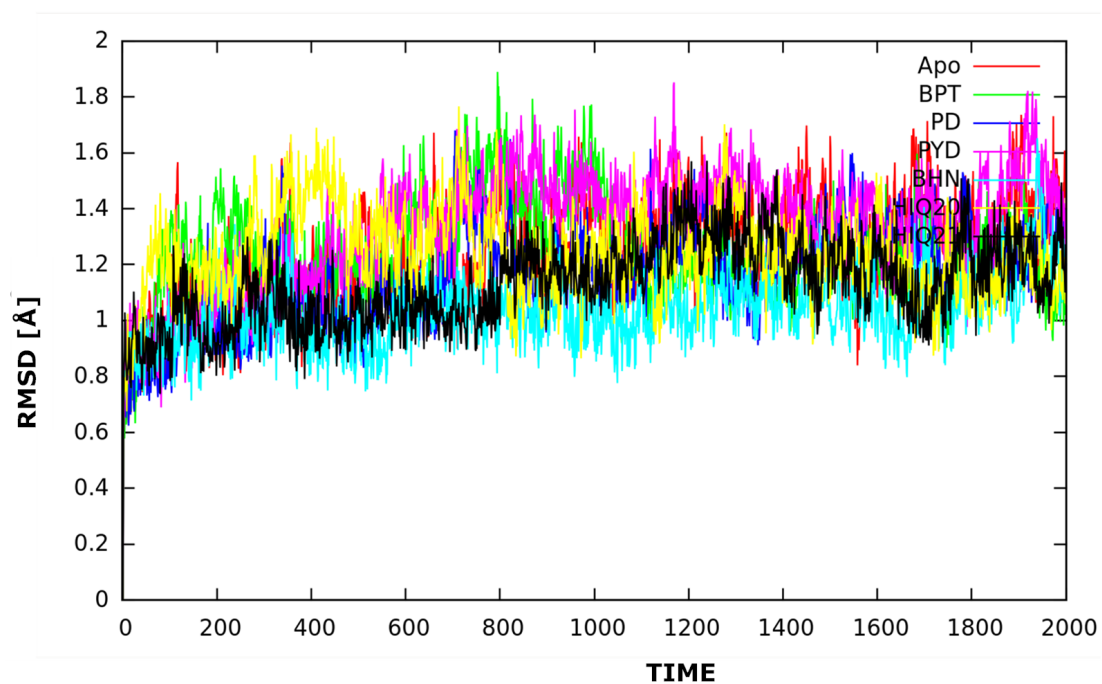

Fig. 4: Correlation between the observed activity (pIC50) and energy contribution of different components to overall binding affinity based on the MM-GB/SA model

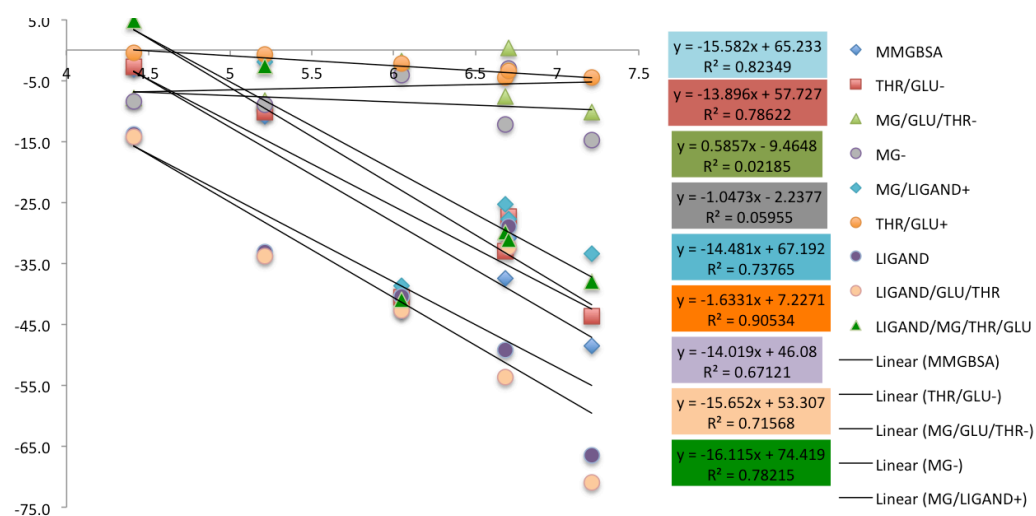

Supplement: c4ib00111g1.pdf [file c4ib00111g1.pdf]
